# Supplementary material for: Lack of robust satellite cell activation and muscle regeneration during the progression of Pompe disease
Source: Springer Nature journal article supplement (doi:10.1186/s40478-015-0243-x), 2015-10-28
Supplement: MOESM1 [file 25665800]

**Supplemental Table 1:** Description of patient and control samples

| <b>Pompe patient group</b> | <b>n</b> | <b>age range (years)</b> | <b>Mean age</b> |
|----------------------------|----------|--------------------------|-----------------|
| <b>1</b>                   | 3        | 0.01-0.3                 | 0.13            |
| <b>2</b>                   | 4        | 1.06-13.09               | 7.2             |
| <b>3</b>                   | 6        | 34.08-62.87              | 48.6            |
| <b>4</b>                   | 6        | 33.46-71.68              | 56.6            |
| <b>DMD patients</b>        | <b>n</b> | <b>age range (years)</b> | <b>Mean age</b> |
|                            | 2        | 5.5-8.25                 | 6.9             |
| <b>control group</b>       | <b>n</b> | <b>age range (years)</b> | <b>Mean age</b> |
| <b>infants</b>             | 3        | 0.01-0.67                | 0.2             |
| <b>juveniles</b>           | 3        | 2.92-16.16               | 9.7             |
| <b>adults</b>              | 5        | 40.44-53.5               | 46.9            |
