# Supplementary material for: Lack of robust satellite cell activation and muscle regeneration during the progression of Pompe disease
Source: Springer Nature journal article supplement (doi:10.1186/s40478-015-0243-x), 2015-10-28

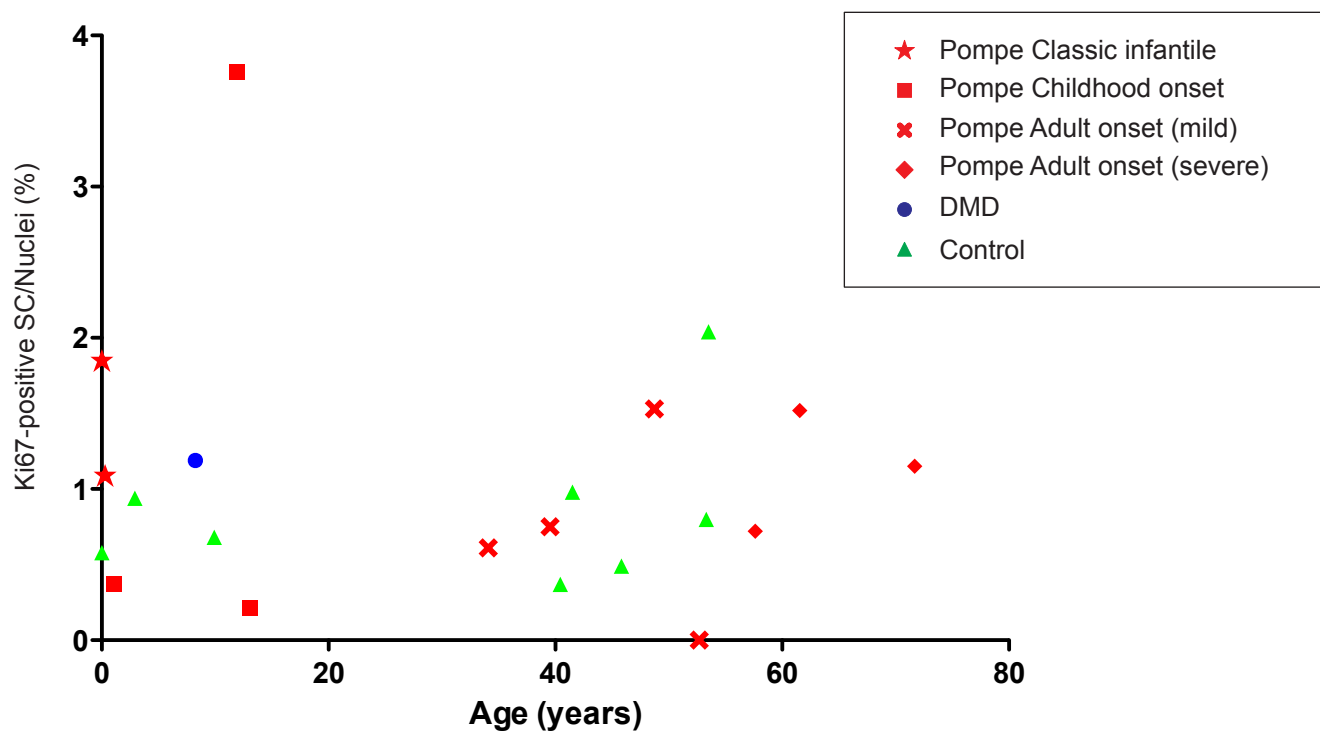

Supplement: MOESM3 [file 25665800]
